# Supplementary material for: Direct Single-Cell Analysis of Human Polar Bodies and Cleavage-Stage Embryos Reveals No Evidence of the Telomere Theory of Reproductive Ageing in Relation to Aneuploidy Generation
Source: MDPI journal article supplement (doi:10.3390/cells8020163), 2019-02-16
Supplement: s1 [file s1]

| Patient ID | Age | Total number of polar bodies assessed | Number of aneuploid polar bodies assessed | Chromosomes involved in aneuploid polar body number 1 | Chromosomes involved in aneuploid polar body number 2 |
|------------|-----|---------------------------------------|-------------------------------------------|-------------------------------------------------------|-------------------------------------------------------|
| 1          | 34  | 3                                     | 1                                         | +4                                                    | n/a                                                   |
| 2          | 38  | 4                                     | 2                                         | -16                                                   | +4, -15                                               |
| 4          | 33  | 4                                     | 2                                         | -17                                                   | -16                                                   |
| 7          | 41  | 4                                     | 2                                         | +10                                                   | +16                                                   |
| 35         | 40  | 4                                     | 2                                         | +22                                                   | complex                                               |
| 41         | 33  | 4                                     | 2                                         | complex                                               | +20                                                   |
| 45         | 31  | 4                                     | 1                                         | +22,+19,+21                                           | n/a                                                   |
| 46         | 42  | 4                                     | 2                                         | -11                                                   | +16                                                   |
| 50         | 33  | 4                                     | 0                                         | n/a                                                   | n/a                                                   |
| 52         | 26  | 4                                     | 0                                         | n/a                                                   | n/a                                                   |
| 59         | 41  | 4                                     | 2                                         | complex                                               | +16,-9,-21                                            |
| 60         | 37  | 4                                     | 2                                         | +22                                                   | +12,+22                                               |
| 66         | 33  | 3                                     | 2                                         | -4                                                    | +16                                                   |
| 70         | 33  | 2                                     | 1                                         | +18,+X                                                | n/a                                                   |
| 72         | 31  | 4                                     | 1                                         | -22                                                   | n/a                                                   |
| 73         | 43  | 4                                     | 2                                         | complex                                               | +1,+7,+10                                             |
| 74         | 47  | 3                                     | 2                                         | +15,+18                                               | +11,+20,+22                                           |
| 75         | 36  | 4                                     | 2                                         | -2,-8                                                 | -22                                                   |
| 76         | 33  | 2                                     | 0                                         | n/a                                                   | n/a                                                   |
| 80         | 32  | 3                                     | 1                                         | +11                                                   | n/a                                                   |
| 82         | 37  | 4                                     | 2                                         | +15,+21                                               | +21                                                   |
| 84         | 37  | 4                                     | 2                                         | -12,-20                                               | complex                                               |
| 91         | 32  | 4                                     | 0                                         | n/a                                                   | n/a                                                   |
| 103        | 31  | 3                                     | 1                                         | +9                                                    | n/a                                                   |
| 115        | 46  | 3                                     | 2                                         | complex                                               | complex                                               |

Table S1: Anonymised patient details and results of aneuploidy screening in first polar bodies following assessment using the 24 Sure preimplantation genetic screening kit. 'complex' refers to aneuploid results involving four or more chromosomes, 'n/a' is not applicable (i.e. no aneuploid polar body available).

| Patient ID | Age | Total number of blastomeres assessed | Number of aneuploid blastomeres assessed | Chromosomes involved in aneuploid blastomere number 1              | Chromosomes involved in aneuploid blastomere number 2 |
|------------|-----|--------------------------------------|------------------------------------------|--------------------------------------------------------------------|-------------------------------------------------------|
| 19         | 34  | 4                                    | 2                                        | -18, -21                                                           | -22                                                   |
| 20         | 43  | 4                                    | 2                                        | XO                                                                 | dup(13)(q21.31-qter),+16                              |
| 21         | 37  | 4                                    | 2                                        | -13,+14                                                            | -15                                                   |
| 22         | 41  | 4                                    | 2                                        | -16                                                                | complex                                               |
| 24         | 42  | 4                                    | 2                                        | complex                                                            | complex                                               |
| 27         | 34  | 4                                    | 2                                        | complex                                                            | del(11)(q23.3-qter)                                   |
| 33         | 36  | 4                                    | 2                                        | 45;-9                                                              | 47;+16                                                |
| 34         | 33  | 4                                    | 2                                        | del(8)(q22.1-qter),-22                                             | -8, del(15)(q25.1-qter)                               |
| 122        | 38  | 4                                    | 2                                        | del(1)(p21.1-pter),+22                                             | del(2)(q33.3-qter),-15                                |
| 123        | 40  | 4                                    | 2                                        | complex                                                            | +19                                                   |
| 127        | 39  | 4                                    | 2                                        | -17,+18                                                            | complex                                               |
| 129        | 42  | 4                                    | 2                                        | +10,+19                                                            | complex                                               |
| 130        | 34  | 4                                    | 2                                        | +13                                                                | complex                                               |
| 137        | 32  | 4                                    | 2                                        | del(6)(p12.1-pter),<br>del(13)(q31.3-qter),<br>del(16)(q11.2-qter) | complex                                               |
| 143        | 41  | 4                                    | 2                                        | complex                                                            | 44;-4,-21                                             |
| 144        | 33  | 4                                    | 2                                        | +14,+22                                                            | del(1)(p32.3-pter),-10                                |
| 163        | 33  | 4                                    | 2                                        | +5,+21,+22                                                         | complex                                               |
| 171        | 27  | 4                                    | 2                                        | dup(1)(p12-qter),+21                                               | complex                                               |
| 172        | 34  | 4                                    | 2                                        | complex                                                            | -4                                                    |
| 188        | 33  | 4                                    | 2                                        | -5                                                                 | complex                                               |
| 224        | 44  | 2                                    | 1                                        | complex                                                            | n/a                                                   |
| 225        | 30  | 4                                    | 2                                        | complex                                                            | complex                                               |

Table S2: Patient details and results of aneuploidy screening in blastomeres biopsied from cleavage stage embryos following assessment using the 24 Sure preimplantation genetic screening kit. 'complex' refers to aneuploid results involving four or more chromosomes, 'n/a' is not applicable (i.e. no embryo available), 'del' refers to a deletion with the chromosome involved identified in the first set of brackets and the portion deleted identified in the second brackets, 'dup' refers to a duplication with the chromosome involved identified in the first set of brackets and the portion duplicated identified in the second brackets.
